# Supplementary material for: Comprehensive assembly and analysis of the transcriptome of maritime pine developing embryos
Source: PubMed Central journal article supplement (PMC6310951; doi:10.1186/s12870-018-1564-2), 2018-12-29

## Data Distribution of Ppinaster

#Sequences

0 5,000 10,000 15,000 20,000 25,000 30,000 35,000 40,000 45,000 50,000 55,000 60,000

Total

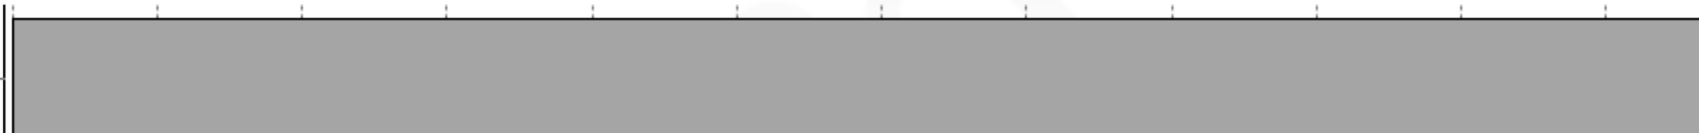

With Blast (without hits)

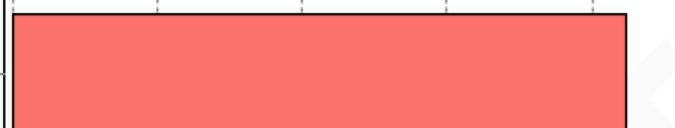

With Blast Hits

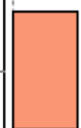

With Mapping

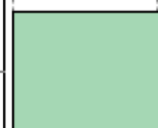

With GO Annotation

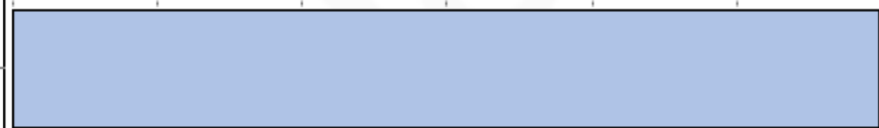

### GO Mapping Distribution [Ppinaster]

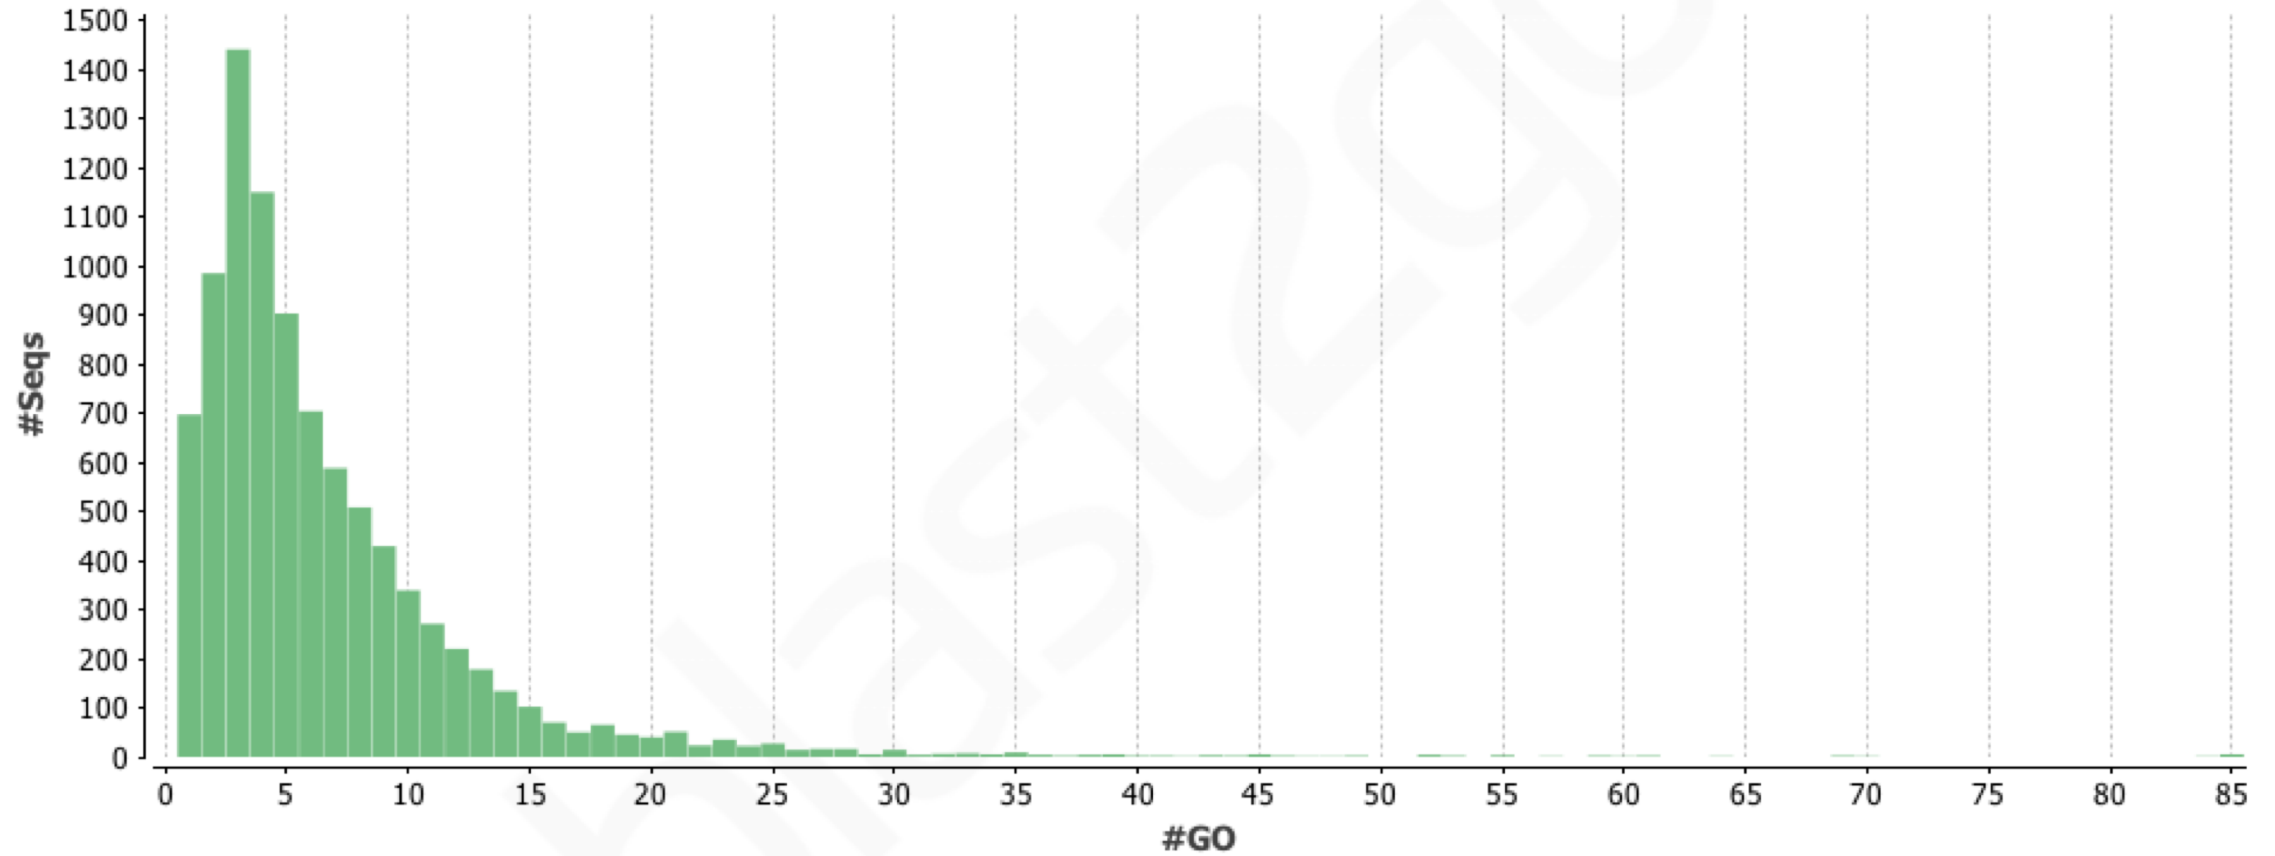

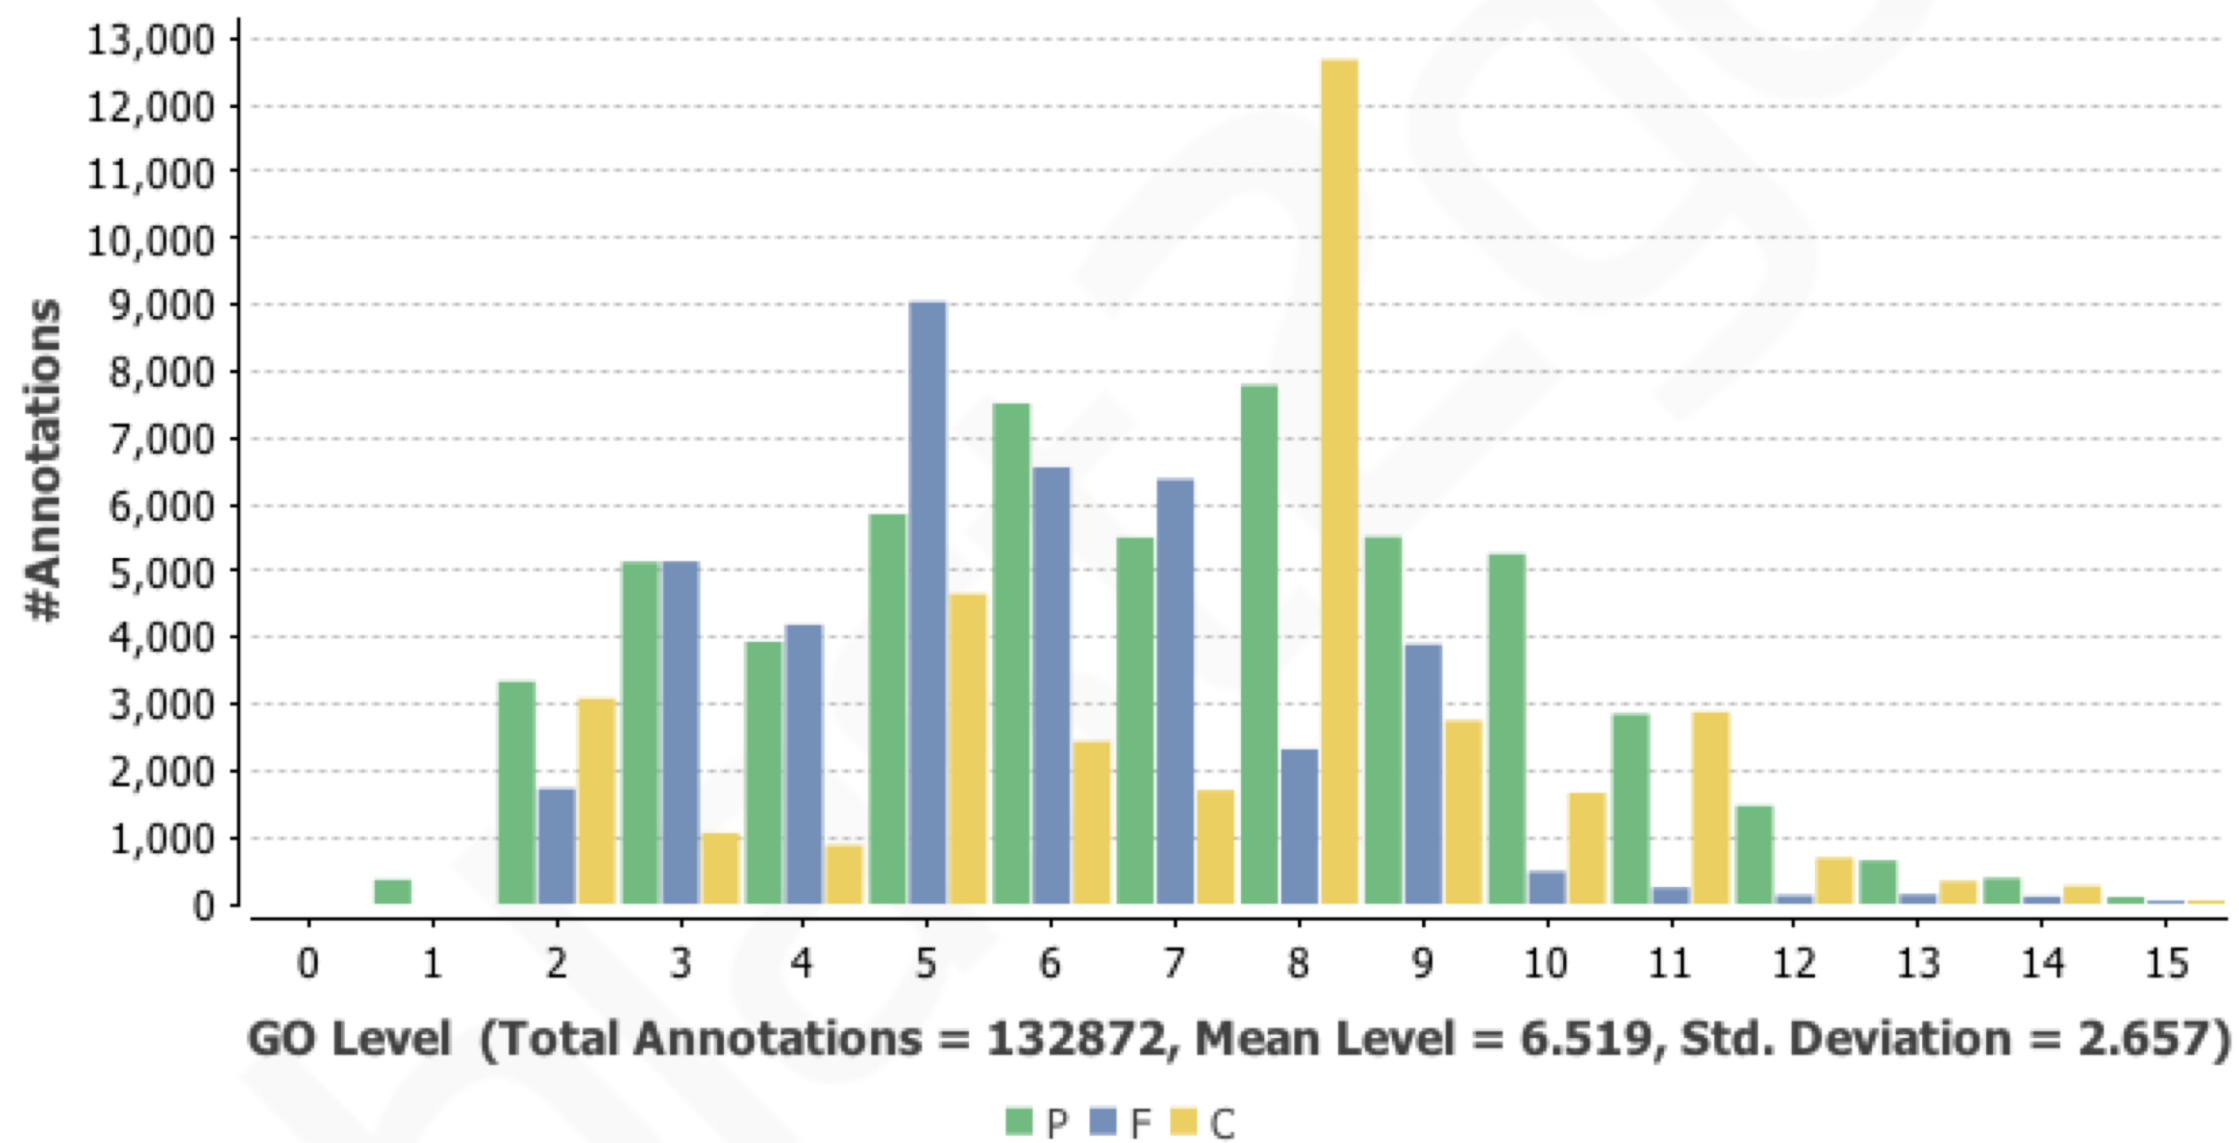

## Annotation Distribution [Ppinaster]

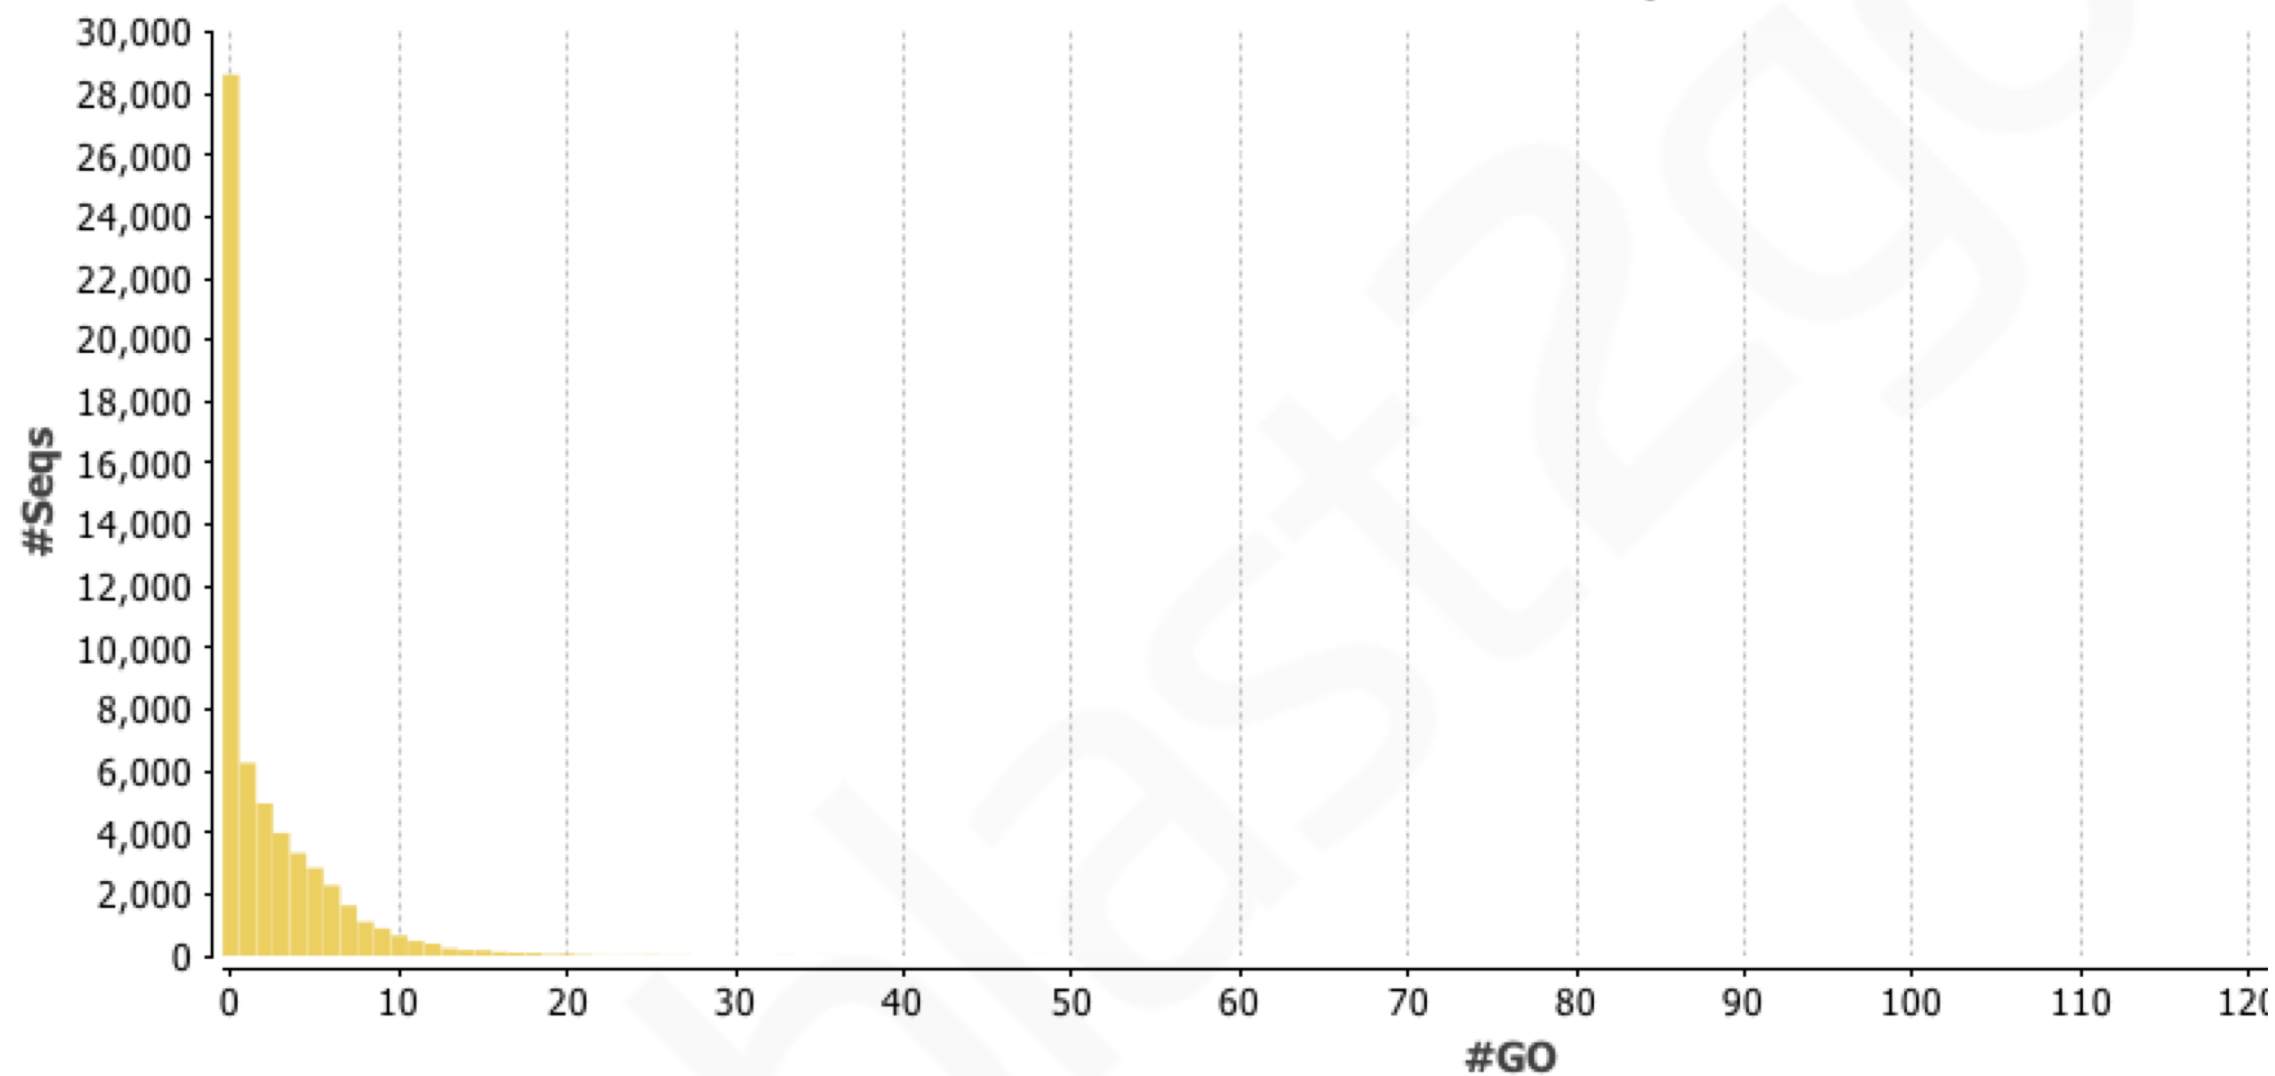

Supplement: 12870_2018_1564_MOESM4_ESM.pdf [file 12870_2018_1564_MOESM4_ESM.pdf]
